# Supplementary material for: Single Ni active sites with a nitrogen and phosphorus dual coordination for an efficient CO2 reduction
Source: Royal Society of Chemistry journal article supplement (doi:10.1039/d2nr00294a), 2022-01-01
Supplement: d2nr00294a1.pdf [file d2nr00294a1.pdf]

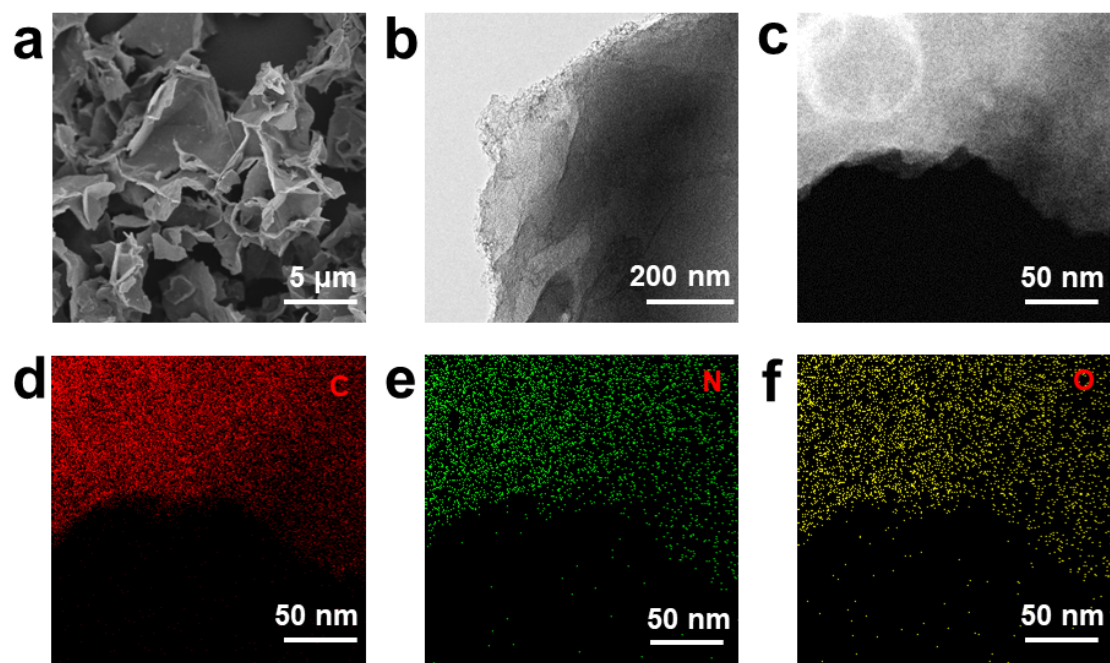

**Figure S1.** (a) SEM images. (b) HRTEM image. (c)-(f) Elemental mapping of NC catalyst.

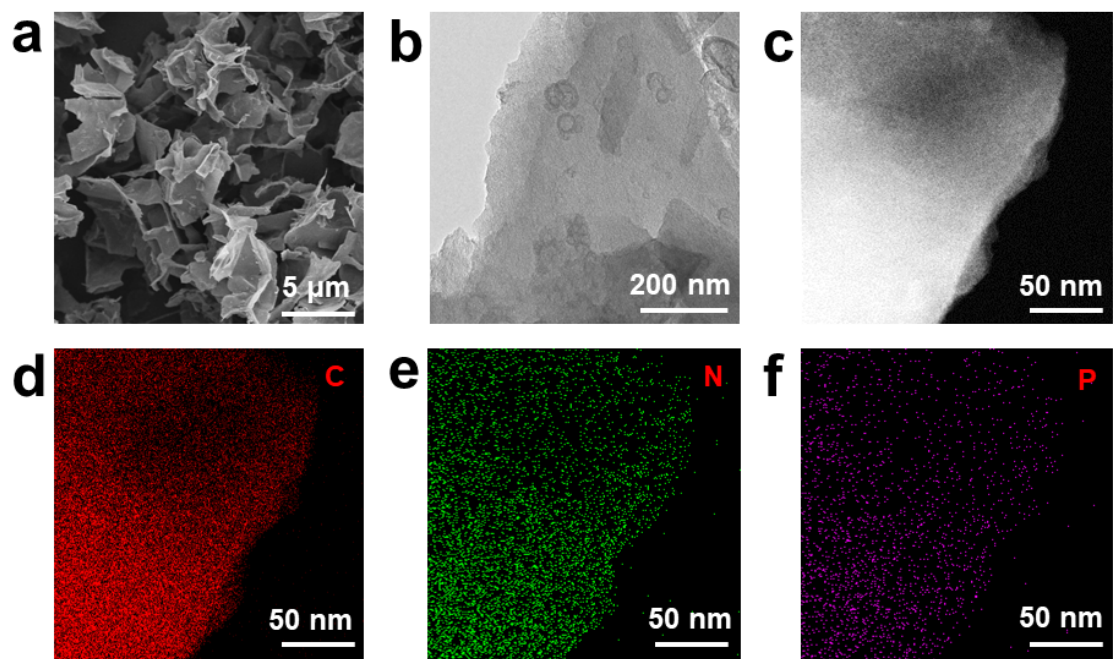

**Figure S2.** (a) SEM images. (b) HRTEM image. (c)-(f) Elemental mapping of NPC catalyst.

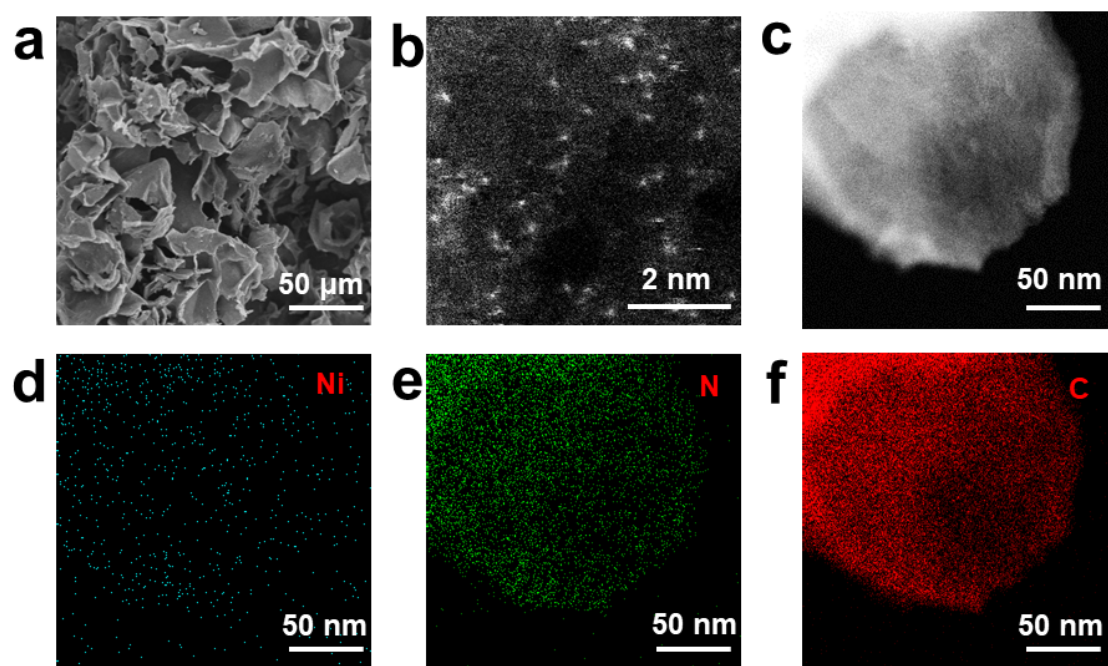

**Figure S3.** (a) SEM images. (b) HAADF-STEM image. (c)-(f) Elemental mapping of Ni-NC catalyst.

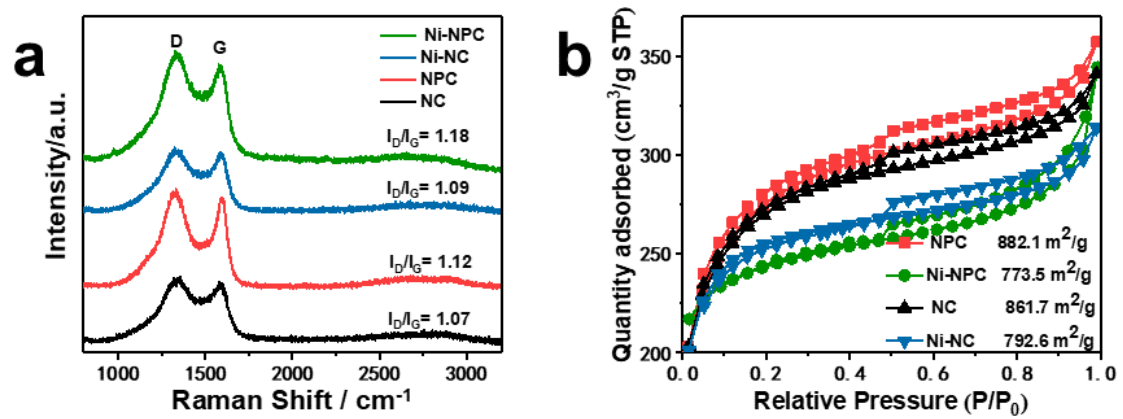

**Figure S4.** (a) Raman spectra and (b) Nitrogen adsorption-desorption isotherms for the NC, NPC, Ni-NC and Ni-NPC samples.

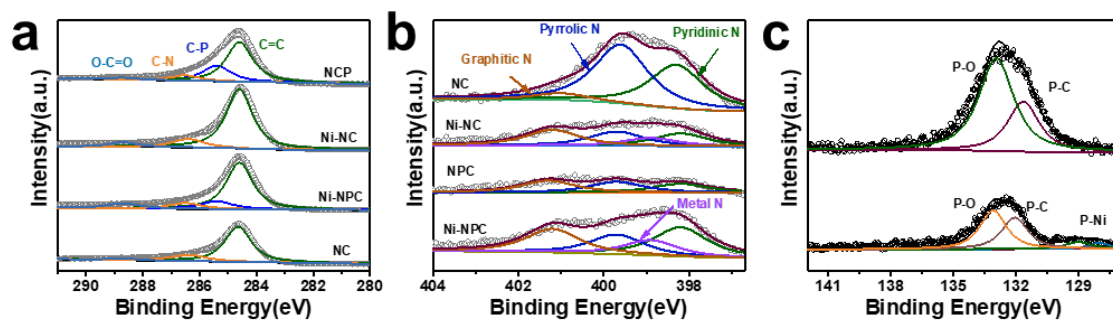

**Figure S5.** (a) Deconvoluted, high-resolution C 1s XPS spectra, (b) Deconvoluted, high-resolution N 1s XPS spectra and (c) Deconvoluted, high-resolution P 2p XPS spectra of different samples.

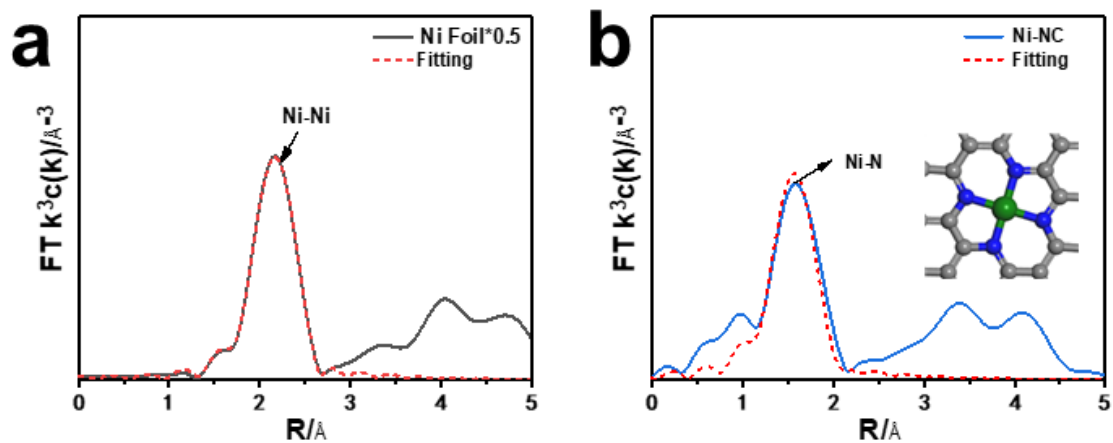

**Figure S6.** The corresponding EXAFS fitting curves for (a) Ni Foil and (b) Ni-NC samples. The inset shows the proposed structures. (solid lines stand for the as-obtained data and dotted lines denote the fitting curves).

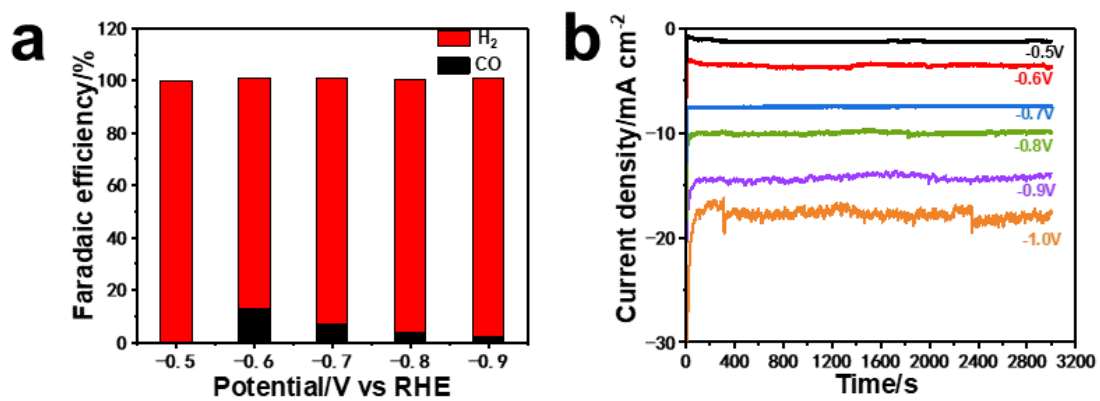

**Figure S7.** (a) Measured CA curves at different potentials and (b) corresponding Faradaic efficiency for NC catalyst in CO<sub>2</sub>-saturated 0.5 M KHCO<sub>3</sub>.

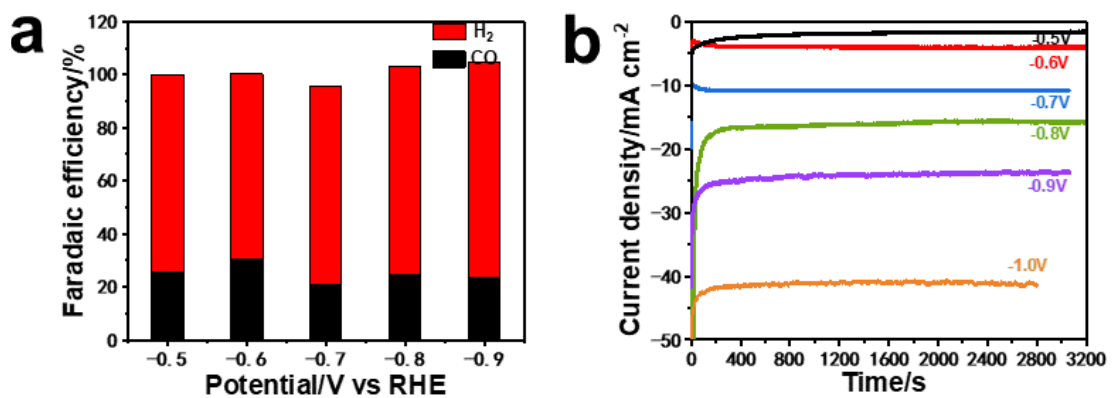

**Figure S8.** (a) Measured CA curves at different potentials and (b) corresponding Faradaic efficiency for NPC catalyst in CO<sub>2</sub>-saturated 0.5 M KHCO<sub>3</sub>.



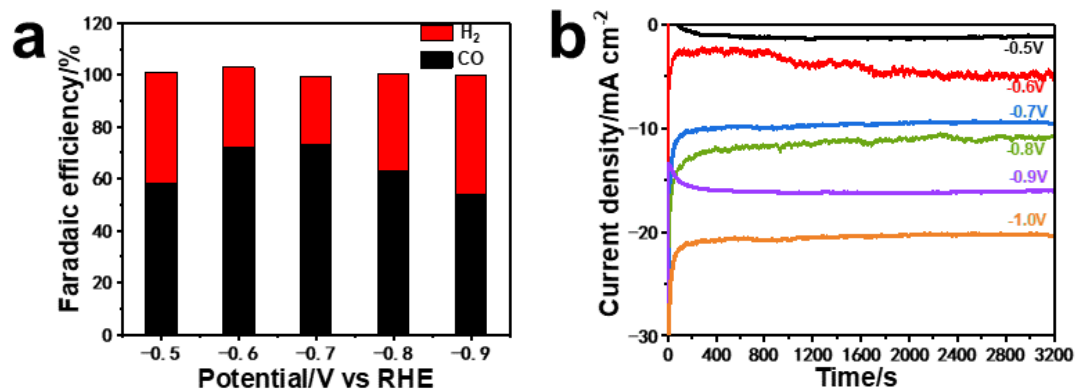

**Figure S9.** (a) Measured CA curves at different potentials and (b) corresponding Faradaic efficiency for Ni-NC catalyst in CO<sub>2</sub>-saturated 0.5 M KHCO<sub>3</sub>.

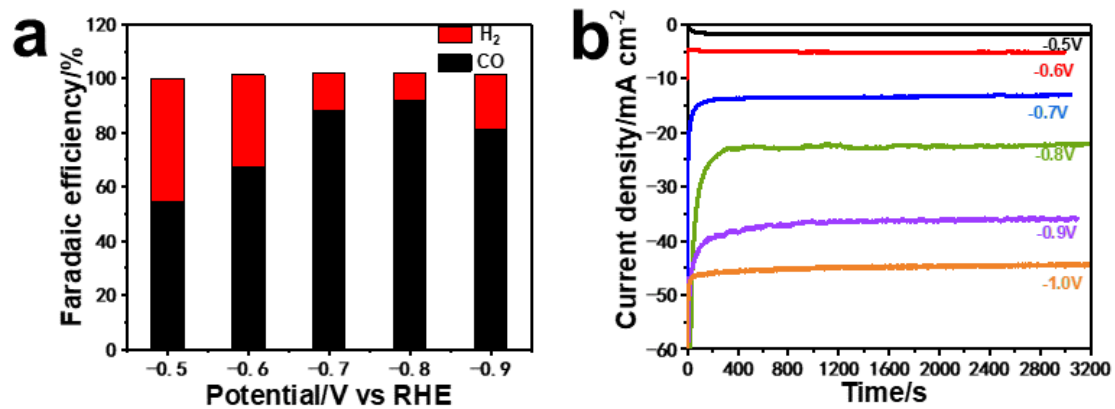

**Figure S10.** (a) Measured CA curves at different potentials and (b) corresponding Faradaic efficiency for Ni-NPC catalyst in CO<sub>2</sub>-saturated 0.5 M KHCO<sub>3</sub>.

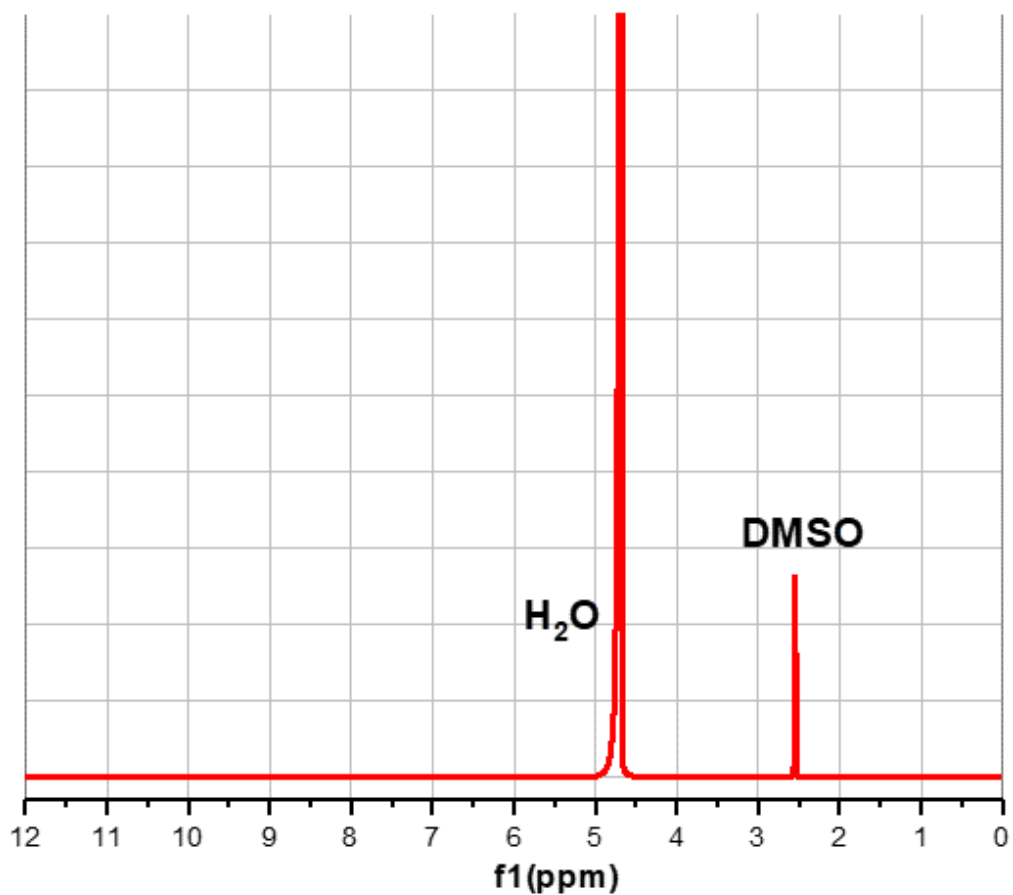

**Figure S11.** NMR spectrum of the electrolyte for Ni-NPC after 16 h constant potential electrolysis at -0.8 V vs. RHE.

In the NMR spectra, no signal of liquid products (e. g. HCOOH) is observed for Ni-NPC, indicating no liquids are generated at Ni-NPC electrocatalyst under 16 h constant potential electrolysis at -0.8 V vs. RHE.

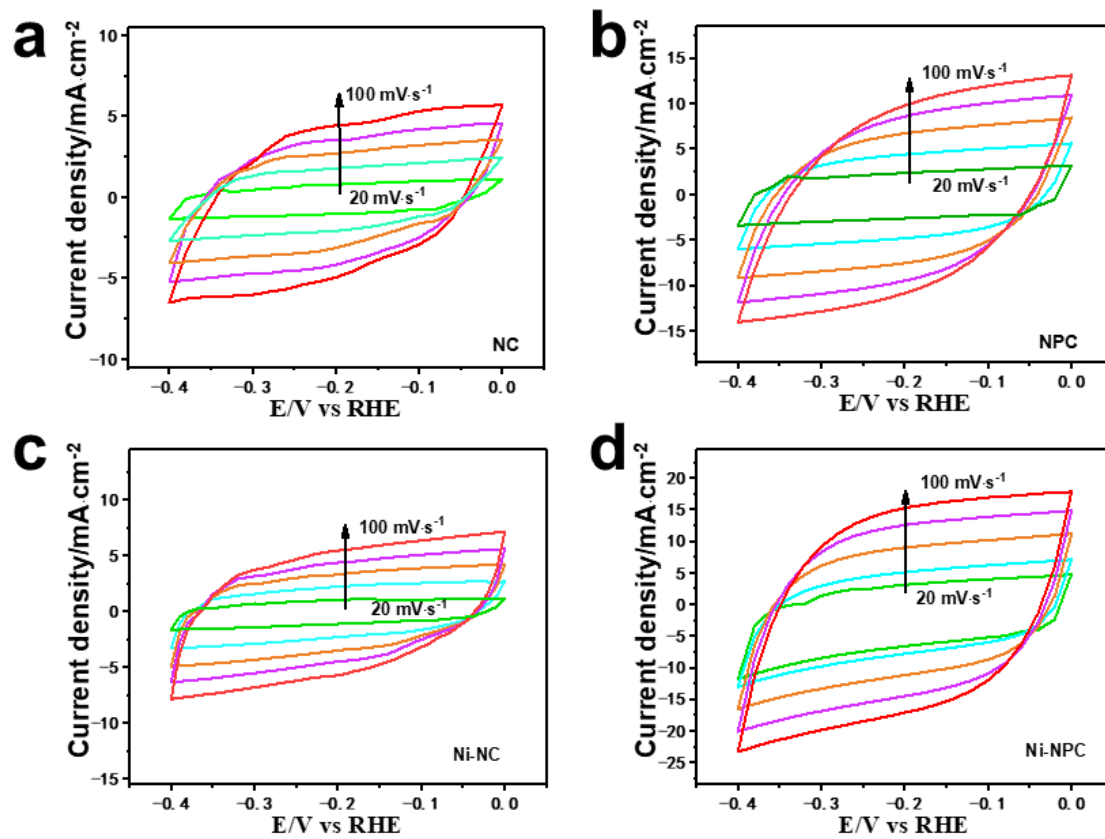

**Figure S12.** CV curves for a) NC, b) NPC c) Ni-NC and d) Ni-NPC catalysts at different scan rates of 20~100 mV s<sup>-1</sup> in the potential range of 0.00~0.4 V (vs. RHE).

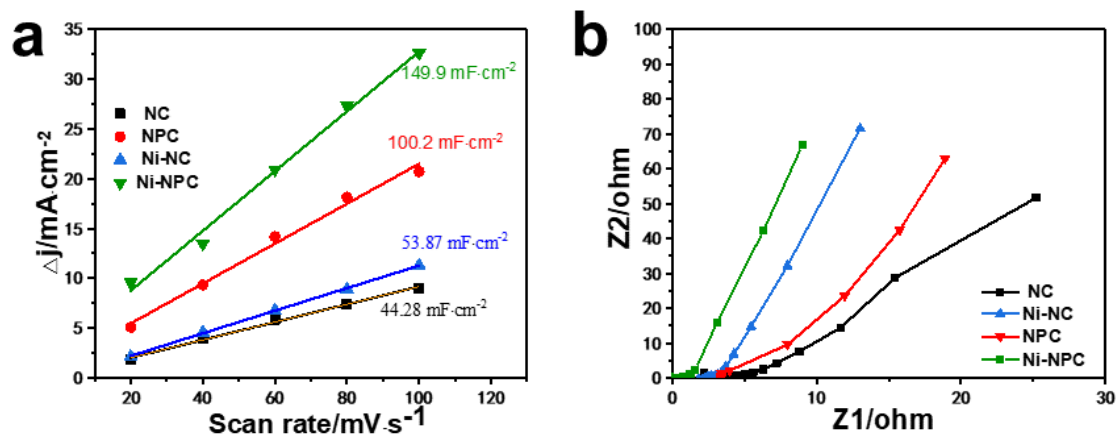

**Figure S13.** (a) Charging current density differences plotted against the scan rates. (b) Nyquist plots for the samples in CO<sub>2</sub>-saturated KHCO<sub>3</sub> electrolyte.

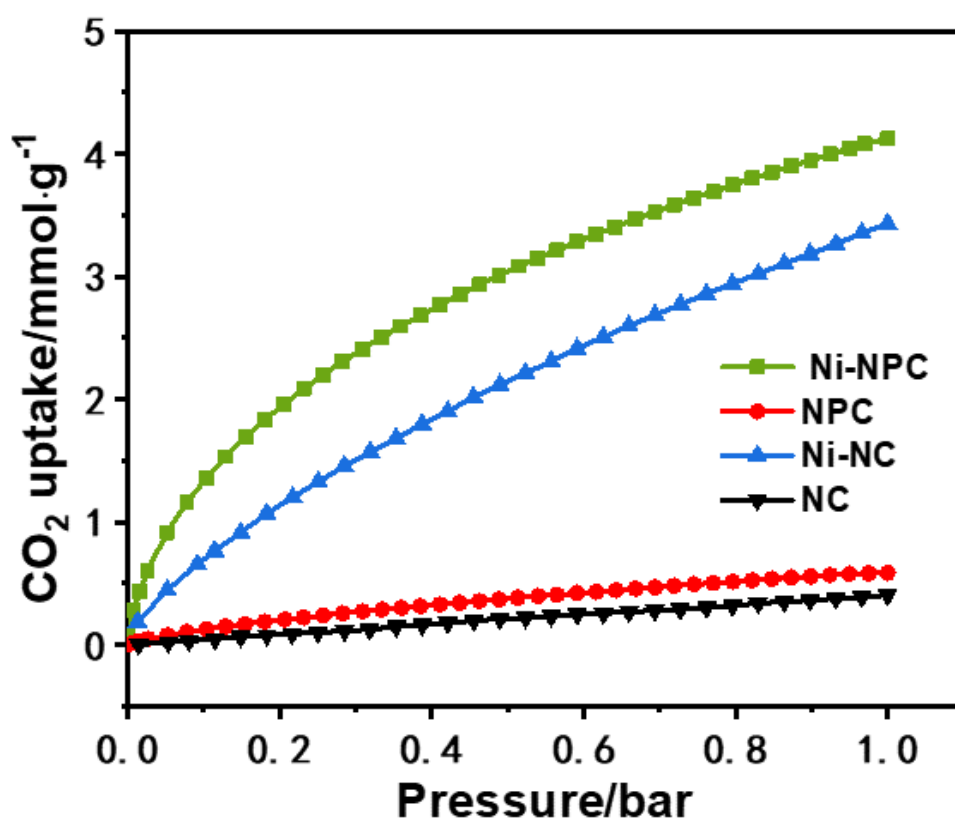

Figure S14. CO<sub>2</sub> adsorption isotherms on different samples.

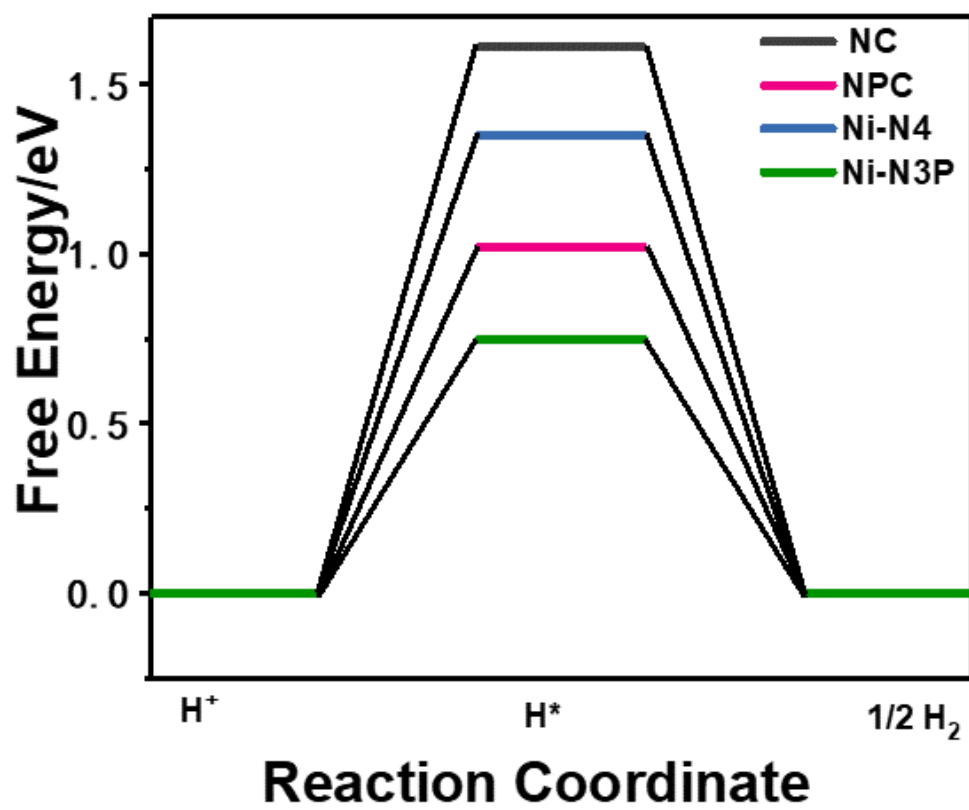

**Figure S15.** Free energy diagram for HER process in NC, NPC, Ni-N4 and Ni-N3P active sites.

**Table S1.** XPS analysis on element content of NC, NPC, Ni-NC and Ni-NPC catalysts.

| <b>Sample</b> | <b>Element content (at%)</b> |              |              |             |             |
|---------------|------------------------------|--------------|--------------|-------------|-------------|
|               | <b>C</b>                     | <b>N</b>     | <b>O</b>     | <b>Ni</b>   | <b>P</b>    |
| <b>Ni-NC</b>  | <b>92.23</b>                 | <b>4.06</b>  | <b>3.30</b>  | <b>0.42</b> | <b>/</b>    |
| <b>Ni-NPC</b> | <b>81.48</b>                 | <b>8.24</b>  | <b>8.77</b>  | <b>0.47</b> | <b>1.05</b> |
| <b>NC</b>     | <b>69.13</b>                 | <b>10.89</b> | <b>19.90</b> | <b>/</b>    | <b>/</b>    |
| <b>NPC</b>    | <b>85.58</b>                 | <b>3.06</b>  | <b>9.19</b>  | <b>/</b>    | <b>2.18</b> |



**Table S2.** EXAFS fitting parameters at Ni K-edge various samples.

| <b>Sample</b>  | <b>Shell</b> | <b>C.N.</b> | <b>R (Å)</b> | <b><math>\sigma^2 \times 10^3</math> (Å<sup>2</sup>)</b> | <b><math>\Delta E</math> (eV)</b> |
|----------------|--------------|-------------|--------------|----------------------------------------------------------|-----------------------------------|
| <b>Ni foil</b> | <b>Ni-Ni</b> | <b>12*</b>  | <b>2.48</b>  | <b>2.1</b>                                               | <b>6.6</b>                        |
| <b>Ni-NC</b>   | <b>Ni-N</b>  | <b>4</b>    | <b>1.94</b>  | <b>3.8</b>                                               | <b>1.9</b>                        |
| <b>Ni-NPC</b>  | <b>Ni-N</b>  | <b>3</b>    | <b>1.89</b>  | <b>6.3</b>                                               | <b>1.8</b>                        |
|                | <b>Ni-P</b>  | <b>1</b>    | <b>2.21</b>  | <b>5.6</b>                                               | <b>7.7</b>                        |

**Table S3.** The Bader Charge of NC, NPC, Ni-N4 and Ni-N3P active sites.

|           | <b>Ni-NC</b>  | <b>Ni-NPC</b> | <b>NC</b>     | <b>NPC</b>    |
|-----------|---------------|---------------|---------------|---------------|
| <b>Ni</b> | <b>+0.839</b> | <b>+0.587</b> | /             | /             |
| <b>N</b>  | <b>-1.124</b> | <b>-1.102</b> | <b>-1.109</b> | <b>-1.119</b> |
| <b>P</b>  | /             | <b>+1.357</b> | /             | <b>+1.154</b> |
